# Supplementary material for: Gut Microbiota Variation With Short-Term Intake of Ginger Juice on Human Health
Source: PubMed Central journal article supplement (PMC7940200; doi:10.3389/fmicb.2020.576061), 2021-02-23
Supplement: Table_1.pdf [file Table_1.pdf]

**Supplemental Table 1.** Community analysis on genus level at time point T7

| Bacteria                              | Ginger_T7<br>Percentage(%) | Control_T7<br>Percentage(%) |
|---------------------------------------|----------------------------|-----------------------------|
| Blautia                               | --                         | 1.18                        |
| [Ruminococcus]_torques_group          | 0.93                       | 1.14                        |
| Ruminococcus_1                        | 0.90                       | 1.50                        |
| Thauera                               | 2.52                       | --                          |
| Acinetobacter                         | --                         | 2.02                        |
| Subdoligranulum                       | 1.31                       | 1.67                        |
| Ruminococcaceae_UCG-002               | 1.77                       | 1.38                        |
| Ruminococcaceae_UCG-014               | 2.18                       | --                          |
| Pseudomonas                           | 2.38                       | 1.19                        |
| Phascolarctobacterium                 | 2.18                       | 1.54                        |
| Ruminococcus_2                        | 1.79                       | 2.10                        |
| Megamonas                             | 1.67                       | 2.46                        |
| Lachnoclostridium                     | 2.03                       | 2.19                        |
| Bifidobacterium                       | 1.99                       | 2.37                        |
| Brevundimonas                         | 1.93                       | 5.28                        |
| Roseburia                             | 3.19                       | 4.55                        |
| Dialister                             | 4.43                       | 3.62                        |
| Faecalibacterium                      | 7.79                       | 5.85                        |
| [Eubacterium]_coprostanoligenes_group | 9.30                       | 5.40                        |
| [Eubacterium]_rectale_group           | 6.19                       | 8.95                        |
| Prevotella                            | 6.22                       | 12.50                       |
| Bacteroides                           | 13.93                      | 12.66                       |
| Others                                | 23.90                      | 19.26                       |
